# Supplementary material for: Dogs can be trained to find a bar magnet
Source: PeerJ. 2018 Dec 17;6:e6117. doi: 10.7717/peerj.6117 (PMC6301327; doi:10.7717/peerj.6117)
Supplement: Supplemental Information 1 [file peerj-06-6117-s001.xlsx]

## Sheet: Tabelle1
dog	date	time	left	middle	right	chosen position	correct choice
Jy	2015-03-26	afternoon	x	o	o	m	0		dog : abbreviation of the dog's name
Jy	2015-03-26	afternoon	o	x	o	m	1		date : when the test was performed
Jy	2015-03-26	afternoon	o	x	o	m	1		time : when the test was performed (early morning= 3:00h-6:00h; morning= 6:00h-9:00h; mid morning= 9:00h-12:00h; midday= 12:00h-15:00h; afternoon= 15:00h-18:00h; evening= 18:00h-21:00h)
Jy	2015-03-26	afternoon	o	o	x	l	0		left/middle/right: position of the jars (o=dummy objects; x=magnet)
Jy	2015-03-26	afternoon	o	x	o	m	1		chosen position: which jar was chosen by the dog (l= left; m=middle; r= right)
Jy	2015-03-26	afternoon	x	o	o	m	0		correct choice: 0= when dog chose one of the dummy objects; 1= when dog chose the magnet
Jy	2015-03-26	afternoon	x	o	o	m	0
Jy	2015-03-26	afternoon	o	o	x	m	0
Jy	2015-03-26	afternoon	o	x	o	m	1
Jy	2015-03-26	afternoon	o	o	x	m	0
Jy	2015-03-27	afternoon	o	o	x	m	0
Jy	2015-03-27	afternoon	o	o	x	m	0
Jy	2015-03-27	afternoon	x	o	o	m	0
Jy	2015-03-27	afternoon	x	o	o	l	1
Jy	2015-03-27	afternoon	o	x	o	m	1
Jy	2015-03-27	afternoon	o	x	o	m	1
Jy	2015-03-27	afternoon	o	o	x	l	0
Jy	2015-03-27	afternoon	o	o	x	l	0
Jy	2015-03-27	afternoon	x	o	o	r	0
Jy	2015-03-27	afternoon	x	o	o	m	0
Jy	2015-03-28	mid morning	x	o	o	m	0
Jy	2015-03-28	mid morning	x	o	o	l	1
Jy	2015-03-28	mid morning	x	o	o	l	1
Jy	2015-03-28	mid morning	o	x	o	m	1
Jy	2015-03-28	mid morning	o	x	o	m	1
Jy	2015-03-28	mid morning	o	x	o	r	0
Jy	2015-03-28	mid morning	o	o	x	r	1
Jy	2015-03-28	mid morning	o	o	x	r	1
Jy	2015-03-28	mid morning	o	o	x	m	0
Jy	2015-03-28	mid morning	x	o	o	m	0
Sy	2015-03-26	afternoon	x	o	o	l	1
Sy	2015-03-26	afternoon	o	x	o	m	1
Sy	2015-03-26	afternoon	o	x	o	m	1
Sy	2015-03-26	afternoon	o	o	x	l	0
Sy	2015-03-26	afternoon	o	x	o	l	0
Sy	2015-03-26	afternoon	x	o	o	m	0
Sy	2015-03-26	afternoon	x	o	o	m	0
Sy	2015-03-26	afternoon	o	o	x	m	0
Sy	2015-03-26	afternoon	o	x	o	m	1
Sy	2015-03-26	afternoon	o	o	x	m	0
Sy	2015-03-27	afternoon	o	o	x	m	0
Sy	2015-03-27	afternoon	o	o	x	m	0
Sy	2015-03-27	afternoon	x	o	o	l	1
Sy	2015-03-27	afternoon	x	o	o	m	0
Sy	2015-03-27	afternoon	o	x	o	m	1
Sy	2015-03-27	afternoon	o	x	o	m	1
Sy	2015-03-27	afternoon	o	o	x	m	0
Sy	2015-03-27	afternoon	o	o	x	r	1
Sy	2015-03-27	afternoon	x	o	o	l	1
Sy	2015-03-27	afternoon	x	o	o	m	0
Sy	2015-03-28	mid morning	x	o	o	l	1
Sy	2015-03-28	mid morning	x	o	o	l	1
Sy	2015-03-28	mid morning	x	o	o	l	1
Sy	2015-03-28	mid morning	o	x	o	m	1
Sy	2015-03-28	mid morning	o	x	o	m	1
Sy	2015-03-28	mid morning	o	x	o	m	1
Sy	2015-03-28	mid morning	o	o	x	r	1
Sy	2015-03-28	mid morning	o	o	x	l	0
Sy	2015-03-28	mid morning	o	o	x	l	0
Sy	2015-03-28	mid morning	x	o	o	m	0
Le	2015-08-17	mid morning	o	x	o	l	0
Le	2015-08-17	mid morning	x	o	o	l	1
Le	2015-08-17	mid morning	o	o	x	l	0
Le	2015-08-17	mid morning	o	x	o	m	1
Le	2015-08-17	mid morning	x	o	o	l	1
Le	2015-08-17	mid morning	o	x	o	l	0
Le	2015-08-17	mid morning	o	o	x	m	0
Le	2015-08-17	mid morning	o	o	x	l	0
Le	2015-08-17	mid morning	o	x	o	m	1
Le	2015-08-17	mid morning	x	o	o	l	1
Le	2015-08-17	mid morning	o	x	o	l	0
Le	2015-08-17	mid morning	x	o	o	l	1
Le	2015-08-17	mid morning	o	o	x	m	0
Le	2015-08-17	mid morning	o	x	o	m	1
Le	2015-08-17	mid morning	x	o	o	l	1
Le	2015-08-17	mid morning	x	o	o	l	1
Le	2015-08-17	mid morning	x	o	o	m	0
Le	2015-08-17	mid morning	o	x	o	m	1
Le	2015-08-17	mid morning	o	x	o	l	0
Le	2015-08-17	mid morning	o	o	x	m	0
Le	2015-08-17	midday	o	o	x	l	0
Le	2015-08-17	midday	o	x	o	m	1
Le	2015-08-17	midday	x	o	o	m	0
Le	2015-08-17	midday	x	o	o	r	0
Le	2015-08-17	midday	o	x	o	m	1
Le	2015-08-17	midday	o	o	x	l	0
Le	2015-08-17	midday	x	o	o	m	0
Le	2015-08-17	midday	o	x	o	m	1
Le	2015-08-17	midday	o	o	x	r	1
Le	2015-08-17	midday	o	o	x	m	0
Jk	2015-07-23	midday	o	x	o	m	1
Jk	2015-07-23	midday	o	o	x	m	0
Jk	2015-07-23	midday	o	x	o	m	1
Jk	2015-07-23	midday	x	o	o	l	1
Jk	2015-07-23	midday	o	o	x	m	0
Jk	2015-07-23	midday	o	o	x	r	1
Jk	2015-07-23	midday	x	o	o	l	1
Jk	2015-07-23	midday	o	x	o	m	1
Jk	2015-07-23	midday	x	o	o	m	0
Jk	2015-07-23	midday	o	x	o	m	1
Jk	2015-07-25	midday	o	x	o	m	1
Jk	2015-07-25	midday	x	o	o	m	0
Jk	2015-07-25	midday	x	o	o	m	0
Jk	2015-07-25	midday	o	o	x	m	0
Jk	2015-07-25	midday	o	x	o	m	1
Jk	2015-07-25	midday	o	o	x	r	1
Jk	2015-07-25	midday	x	o	o	l	1
Jk	2015-07-25	midday	o	o	x	r	1
Jk	2015-07-25	midday	o	x	o	l	0
Jk	2015-07-25	afternoon	o	o	x	m	0
Jk	2015-08-12	afternoon	o	x	o	m	1
Jk	2015-08-12	afternoon	x	o	o	r	0
Jk	2015-08-12	afternoon	o	o	x	r	1
Jk	2015-08-12	afternoon	o	o	x	m	0
Jk	2015-08-12	afternoon	o	x	o	m	1
Jk	2015-08-12	afternoon	x	o	o	l	1
Jk	2015-08-12	afternoon	o	x	o	m	1
Jk	2015-08-12	afternoon	o	o	x	r	1
Jk	2015-08-12	afternoon	o	x	o	m	1
Jk	2015-08-12	afternoon	x	o	o	l	1
Dt	2015-08-20	evening	x	o	o	l	1
Dt	2015-08-20	evening	o	o	x	r	1
Dt	2015-08-20	evening	x	o	o	r	0
Dt	2015-08-20	evening	x	o	o	m	0
Dt	2015-08-20	evening	o	x	o	m	1
Dt	2015-08-20	evening	o	o	x	r	1
Dt	2015-08-20	evening	o	x	o	m	1
Dt	2015-08-20	evening	o	x	o	r	0
Dt	2015-08-27	evening	o	x	o	m	1
Dt	2015-08-27	evening	x	o	o	m	0
Dt	2015-08-27	evening	o	o	x	l	0
Dt	2015-08-27	evening	o	o	x	r	1
Dt	2015-08-27	evening	o	x	o	r	0
Dt	2015-09-10	evening	o	o	x	l	0
Dt	2015-09-10	evening	o	x	o	m	1
Dt	2015-09-10	evening	x	o	o	l	1
Dt	2015-09-10	evening	x	o	o	l	1
Dt	2015-09-10	evening	o	o	x	l	0
Dt	2015-09-10	evening	x	o	o	l	1
Dt	2015-09-24	evening	o	x	o	r	0
Dt	2015-09-24	evening	x	o	o	l	1
Dt	2015-09-24	evening	o	x	o	m	1
Dt	2015-09-24	evening	o	o	x	r	1
Dt	2015-09-24	evening	o	x	o	l	0
Dt	2015-09-24	evening	o	o	x	r	1
Dt	2015-09-24	evening	o	x	o	m	1
Dt	2015-09-24	evening	o	o	x	m	0
Dt	2015-09-24	evening	x	o	o	l	1
Dt	2015-09-24	evening	x	o	o	m	0
Dt	2015-09-24	evening	o	o	x	m	0
Ca	2015-08-21	afternoon	o	o	x	r	1
Ca	2015-08-21	afternoon	x	o	o	l	1
Ca	2015-08-21	afternoon	o	x	o	m	1
Ca	2015-08-21	afternoon	x	o	o	l	1
Ca	2015-08-21	afternoon	o	x	o	m	1
Ca	2015-08-21	afternoon	o	o	x	m	0
Ca	2015-08-28	afternoon	o	x	o	m	1
Ca	2015-08-28	afternoon	x	o	o	l	1
Ca	2015-08-28	afternoon	o	o	x	r	1
Ca	2015-08-28	afternoon	x	o	o	l	1
Ca	2015-08-28	afternoon	o	x	o	r	0
Ca	2015-09-18	afternoon	o	o	x	r	1
Ca	2015-09-18	afternoon	o	o	x	m	0
Ca	2015-09-18	afternoon	o	x	o	r	0
Ca	2015-09-18	afternoon	x	o	o	l	1
Ca	2015-09-18	afternoon	o	x	o	l	0
Ca	2015-09-18	afternoon	o	o	x	r	1
Ca	2015-09-18	afternoon	o	x	o	m	1
Ca	2015-09-18	afternoon	x	o	o	r	0
Ca	2015-09-25	afternoon	x	o	o	l	1
Ca	2015-09-25	afternoon	o	x	o	m	1
Ca	2015-09-25	afternoon	o	x	o	m	1
Ca	2015-09-25	afternoon	o	o	x	r	1
Ca	2015-09-25	afternoon	x	o	o	m	0
Ca	2016-07-09	midday	o	x	o	m	1
Ca	2016-07-09	midday	o	o	x	r	1
Ca	2016-07-09	midday	x	o	o	l	1
Ca	2016-07-09	midday	o	x	o	l	0
Ca	2016-07-09	midday	o	o	x	r	1
Ca	2016-07-09	midday	x	o	o	l	1
Bi	2015-08-21	afternoon	o	o	x	r	1
Bi	2015-08-21	afternoon	x	o	o	m	0
Bi	2015-08-21	afternoon	o	x	o	m	1
Bi	2015-08-21	afternoon	x	o	o	l	1
Bi	2015-08-21	afternoon	o	x	o	l	0
Bi	2015-08-21	afternoon	o	o	x	r	1
Bi	2015-08-28	afternoon	o	x	o	l	0
Bi	2015-08-28	afternoon	o	o	x	r	1
Bi	2015-08-28	afternoon	o	x	o	m	1
Bi	2015-08-28	afternoon	x	o	o	l	1
Bi	2015-08-28	afternoon	o	x	o	m	1
Bi	2015-08-28	afternoon	o	o	x	m	0
Bi	2015-09-04	afternoon	x	o	o	r	0
Bi	2015-09-04	afternoon	o	x	o	l	0
Bi	2015-09-04	afternoon	o	x	o	m	1
Bi	2015-09-04	afternoon	x	o	o	l	1
Bi	2015-09-04	afternoon	o	x	o	m	1
Bi	2015-09-04	afternoon	o	o	x	r	1
Bi	2015-09-11	afternoon	o	o	x	r	1
Bi	2015-09-11	afternoon	o	x	o	r	0
Bi	2015-09-11	afternoon	o	x	o	m	1
Bi	2015-09-11	afternoon	x	o	o	l	1
Bi	2016-07-01	afternoon	o	o	x	r	1
Bi	2016-07-01	afternoon	x	o	o	l	1
Bi	2016-07-01	afternoon	x	o	o	l	1
Bi	2016-07-01	afternoon	o	o	x	l	0
Bi	2016-07-01	afternoon	x	o	o	m	0
Bi	2016-07-09	midday	o	o	x	r	1
Bi	2016-07-09	midday	x	o	o	l	1
Bi	2016-07-09	midday	o	o	x	l	0
Ka	2015-09-04	afternoon	o	x	o	m	1
Ka	2015-09-04	afternoon	o	x	o	r	0
Ka	2015-09-04	afternoon	x	o	o	m	0
Ka	2015-09-04	afternoon	x	o	o	l	1
Ka	2015-09-18	afternoon	o	o	x	r	1
Ka	2015-09-18	afternoon	o	x	o	r	0
Ka	2015-09-18	afternoon	o	x	o	m	1
Ka	2015-09-18	afternoon	x	o	o	l	1
Ka	2015-09-25	afternoon	x	o	o	m	0
Ka	2015-09-25	afternoon	o	x	o	m	1
Ka	2015-09-25	afternoon	o	o	x	m	0
Ka	2015-09-25	afternoon	x	o	o	r	0
Ka	2015-09-25	afternoon	o	x	o	m	1
Ka	2016-06-24	afternoon	x	o	o	l	1
Ka	2016-06-24	afternoon	o	x	o	r	0
Ka	2016-06-24	afternoon	o	o	x	m	0
Ka	2016-06-24	afternoon	o	o	x	r	1
Ka	2016-06-24	afternoon	x	o	o	l	1
Ka	2016-07-01	afternoon	o	o	x	r	1
Ka	2016-07-01	afternoon	o	x	o	m	1
Ka	2016-07-01	afternoon	o	o	x	m	0
Ka	2016-07-01	afternoon	o	o	x	r	1
Ka	2016-07-01	afternoon	o	x	o	m	1
Ka	2016-07-01	afternoon	o	o	x	m	0
Ka	2016-07-08	afternoon	o	o	x	r	1
Ka	2016-07-08	afternoon	x	o	o	r	0
Ka	2016-07-08	afternoon	x	o	o	l	1
Ka	2016-07-08	afternoon	o	x	o	m	1
Ka	2016-07-08	afternoon	o	o	x	r	1
Ka	2016-07-08	afternoon	x	o	o	l	1
Mx	2015-09-24	evening	o	x	o	m	1
Mx	2015-09-24	evening	x	o	o	r	0
Mx	2015-09-24	evening	o	x	o	m	1
Mx	2015-09-24	evening	o	x	o	m	1
Mx	2015-09-24	evening	o	o	x	r	1
Mx	2015-09-24	evening	x	o	o	r	0
Mx	2016-07-19	evening	x	o	o	l	1
Mx	2016-07-19	evening	o	o	x	l	0
Mx	2016-07-19	evening	o	x	o	l	0
Mx	2016-07-19	evening	o	o	x	r	1
Mx	2016-07-19	evening	x	o	o	l	1
Mx	2016-07-19	evening	x	o	o	l	1
Mx	2016-07-19	evening	o	x	o	l	0
Mx	2016-07-19	evening	o	o	x	m	0
Mx	2016-07-26	evening	o	x	o	m	1
Mx	2016-07-26	evening	x	o	o	r	0
Mx	2016-07-26	evening	x	o	o	l	1
Mx	2016-07-26	evening	o	x	o	m	1
Mx	2016-07-26	evening	o	o	x	m	0
Mx	2016-07-26	evening	o	o	x	l	0
Mx	2016-07-26	evening	x	o	o	l	1
Mx	2016-07-26	evening	o	x	o	l	0
Mx	2016-07-26	evening	o	o	x	r	1
Mx	2016-07-26	evening	o	o	x	r	1
Mx	2016-07-26	evening	o	x	o	r	0
Mx	2016-07-26	evening	x	o	o	l	1
Mx	2016-07-26	evening	o	o	x	l	0
Mx	2016-07-26	evening	o	x	o	m	1
Mx	2016-07-26	evening	o	o	x	m	0
Mx	2016-07-26	evening	x	o	o	r	0
Ts	2015-08-27	afternoon	o	o	x	r	1
Ts	2015-08-27	afternoon	o	x	o	m	1
Ts	2015-08-27	afternoon	x	o	o	l	1
Ts	2015-08-27	afternoon	o	o	x	m	0
Ts	2015-08-27	afternoon	o	o	x	l	0
Ts	2015-09-03	afternoon	x	o	o	l	1
Ts	2015-09-03	afternoon	o	o	x	m	0
Ts	2015-09-03	afternoon	o	o	x	m	0
Ts	2015-09-10	afternoon	o	x	o	m	1
Ts	2015-09-10	afternoon	x	o	o	l	1
Ts	2015-09-10	afternoon	o	o	x	l	0
Ts	2015-09-10	afternoon	o	x	o	m	1
Ts	2015-09-10	afternoon	o	o	x	l	0
Ts	2015-09-10	afternoon	x	o	o	l	1
Ts	2016-06-21	afternoon	o	x	o	m	1
Ts	2016-06-21	afternoon	x	o	o	l	1
Ts	2016-06-21	afternoon	x	o	o	l	1
Ts	2016-06-21	afternoon	o	o	x	r	1
Ts	2016-06-21	afternoon	o	x	o	m	1
Ts	2016-06-21	afternoon	o	o	x	l	0
Ts	2016-06-21	afternoon	o	x	o	m	1
Ts	2016-07-26	afternoon	o	x	o	m	1
Ts	2016-07-26	afternoon	x	o	o	l	1
Ts	2016-07-26	afternoon	o	x	o	l	0
Ts	2016-07-26	afternoon	x	o	o	l	1
Ts	2016-07-26	afternoon	o	x	o	l	0
Ts	2016-07-26	afternoon	o	o	x	m	0
Ts	2016-07-26	afternoon	o	x	o	r	0
Ts	2016-07-26	afternoon	x	o	o	l	1
Ts	2016-07-26	afternoon	x	o	o	m	0
Gy	2015-09-24	evening	o	o	x	m	0
Gy	2015-09-24	evening	x	o	o	l	1
Gy	2015-09-24	evening	o	x	o	l	0
Gy	2015-09-24	evening	x	o	o	l	1
Gy	2016-07-19	evening	x	o	o	r	0
Gy	2016-07-19	evening	o	o	x	l	0
Gy	2016-07-19	evening	x	o	o	l	1
Gy	2016-07-19	evening	o	x	o	m	1
Gy	2016-07-19	evening	o	o	x	r	1
Gy	2016-08-09	evening	o	x	o	r	0
Gy	2016-08-09	evening	x	o	o	m	0
Gy	2016-08-09	evening	o	x	o	m	1
Gy	2016-08-09	evening	x	o	o	l	1
Gy	2016-08-09	evening	o	x	o	m	1
Gy	2016-08-09	evening	o	o	x	r	1
Gy	2016-08-09	evening	o	x	o	r	0
Gy	2016-08-16	evening	o	o	x	m	0
Gy	2016-08-16	evening	o	x	o	m	1
Gy	2016-08-16	evening	x	o	o	m	0
Gy	2016-08-16	evening	o	x	o	m	1
Gy	2016-08-16	evening	o	o	x	r	1
Gy	2016-08-16	evening	o	x	o	r	0
Gy	2016-08-16	evening	x	o	o	r	0
Gy	2016-08-23	evening	o	o	x	l	0
Gy	2016-08-23	evening	o	o	x	r	1
Gy	2016-08-23	evening	o	x	o	m	1
Gy	2016-08-23	evening	o	o	x	l	0
Gy	2016-08-23	evening	x	o	o	l	1
Gy	2016-08-23	evening	o	x	o	r	0
Gy	2016-08-23	evening	x	o	o	l	1
Ly	2015-09-10	evening	x	o	o	l	1
Ly	2015-09-10	evening	x	o	o	l	1
Ly	2015-09-10	evening	o	x	o	m	1
Ly	2015-09-24	evening	o	x	o	m	1
Ly	2015-09-24	evening	x	o	o	l	1
Ly	2015-09-24	evening	o	x	o	m	1
Ly	2015-09-24	evening	o	o	x	r	1
Ly	2016-06-21	evening	x	o	o	l	1
Ly	2016-06-21	evening	o	o	x	l	0
Ly	2016-06-21	evening	o	x	o	m	1
Ly	2016-06-21	evening	o	o	x	m	0
Ly	2016-06-21	evening	x	o	o	l	1
Ly	2016-07-05	evening	o	o	x	l	0
Ly	2016-07-05	evening	o	o	x	l	0
Ly	2016-07-05	evening	x	o	o	l	1
Ly	2016-07-05	evening	o	x	o	m	1
Ly	2016-07-05	evening	o	o	x	l	0
Ly	2016-08-23	evening	o	x	o	m	1
Ly	2016-08-23	evening	x	o	o	l	1
Ly	2016-08-23	evening	o	x	o	m	1
Ly	2016-08-23	evening	o	o	x	r	1
Ly	2016-08-30	evening	o	o	x	r	1
Ly	2016-08-30	evening	o	x	o	m	1
Ly	2016-08-30	evening	x	o	o	l	1
Ly	2016-08-30	evening	o	x	o	m	1
Ly	2016-08-30	evening	o	o	x	m	0
Ly	2016-08-30	evening	o	x	o	m	1
Ly	2016-08-30	evening	x	o	o	m	0
Ly	2016-08-30	evening	x	o	o	m	0
Ly	2016-08-30	evening	o	o	x	r	1
Fi	2015-09-10	afternoon	x	o	o	l	1
Fi	2015-09-10	afternoon	o	x	o	l	0
Fi	2015-09-10	afternoon	o	x	o	r	0
Fi	2015-09-10	afternoon	o	x	o	m	1
Fi	2015-09-10	afternoon	o	x	o	m	1
Fi	2015-09-10	afternoon	x	o	o	l	1
Fi	2016-07-26	afternoon	o	x	o	m	1
Fi	2016-07-26	afternoon	x	o	o	m	0
Fi	2016-07-26	afternoon	o	o	x	r	1
Fi	2016-07-26	afternoon	o	o	x	l	0
Fi	2016-07-26	afternoon	x	o	o	l	1
Fi	2016-07-26	afternoon	x	o	o	l	1
Fi	2016-08-09	afternoon	o	o	x	r	1
Fi	2016-08-09	afternoon	x	o	o	l	1
Fi	2016-08-09	afternoon	o	x	o	m	1
Fi	2016-08-09	afternoon	o	o	x	m	0
Fi	2016-08-09	afternoon	o	x	o	m	1
Fi	2016-08-09	afternoon	o	o	x	m	0
Fi	2016-08-09	afternoon	o	x	o	l	0
Fi	2016-08-16	afternoon	o	x	o	m	1
Fi	2016-08-16	afternoon	x	o	o	l	1
Fi	2016-08-16	afternoon	o	o	x	l	0
Fi	2016-08-16	afternoon	o	o	x	l	0
Fi	2016-08-16	afternoon	x	o	o	m	0
Fi	2016-08-16	afternoon	o	o	x	l	0
Fi	2016-08-30	afternoon	x	o	o	l	1
Fi	2016-08-30	afternoon	o	o	x	r	1
Fi	2016-08-30	afternoon	x	o	o	m	0
Fi	2016-08-30	afternoon	o	o	x	l	0
Fi	2016-08-30	afternoon	o	x	o	m	1
Kr	2015-09-24	evening	o	o	x	m	0
Kr	2015-09-24	evening	o	x	o	m	1
Kr	2016-06-21	evening	x	o	o	l	1
Kr	2016-06-21	evening	x	o	o	l	1
Kr	2016-06-21	evening	o	x	o	l	0
Kr	2016-06-21	evening	x	o	o	l	1
Kr	2016-06-21	evening	o	o	x	r	1
Kr	2016-06-21	evening	o	o	x	r	1
Kr	2016-06-21	evening	x	o	o	l	1
Kr	2016-06-21	evening	o	x	o	m	1
Kr	2016-06-21	evening	x	o	o	l	1
Kr	2016-06-21	evening	o	o	x	l	0
Kr	2016-06-21	evening	o	o	x	l	0
Kr	2016-08-09	evening	o	x	o	l	0
Kr	2016-08-09	evening	o	x	o	m	1
Kr	2016-08-09	evening	x	o	o	l	1
Kr	2016-08-09	evening	o	o	x	l	0
Kr	2016-08-09	evening	x	o	o	m	0
Kr	2016-08-09	evening	o	x	o	l	0
Kr	2016-08-09	evening	o	x	o	m	1
Kr	2016-08-09	evening	o	o	x	m	0
Kr	2016-08-16	evening	o	x	o	l	0
Kr	2016-08-16	evening	o	o	x	l	0
Kr	2016-08-16	evening	x	o	o	l	1
Kr	2016-08-16	evening	o	x	o	m	1
Kr	2016-08-16	evening	x	o	o	l	1
Kr	2016-08-16	evening	o	o	x	m	0
Kr	2016-10-11	evening	o	o	x	r	1
Kr	2016-10-11	evening	o	x	o	l	0
Kr	2016-10-11	evening	x	o	o	r	0
Pl	2015-09-24	evening	o	o	x	r	1
Pl	2015-09-24	evening	o	x	o	r	0
Pl	2015-09-24	evening	x	o	o	l	1
Pl	2015-09-24	evening	x	o	o	m	0
Pl	2016-07-19	evening	o	x	o	m	1
Pl	2016-07-19	evening	o	x	o	m	1
Pl	2016-07-19	evening	x	o	o	m	0
Pl	2016-08-09	evening	o	x	o	m	1
Pl	2016-08-09	evening	o	o	x	r	1
Pl	2016-08-09	evening	o	x	o	m	1
Pl	2016-08-09	evening	x	o	o	l	1
Pl	2016-08-09	evening	o	x	o	m	1
Pl	2016-08-09	evening	o	o	x	r	1
Pl	2016-08-09	evening	x	o	o	m	0
Pl	2016-08-09	evening	o	o	x	l	0
Pl	2016-08-09	evening	o	x	o	m	1
Pl	2016-08-09	evening	o	o	x	m	0
Pl	2016-08-09	evening	o	x	o	l	0
Pl	2016-08-09	evening	x	o	o	l	1
Pl	2016-08-09	evening	o	x	o	r	0
Pl	2016-08-09	evening	o	o	x	r	1
Pl	2016-08-09	evening	o	x	o	m	1
Pl	2016-11-24	midday	x	o	o	l	1
Pl	2016-11-24	midday	o	o	x	m	0
Pl	2016-11-24	midday	o	x	o	m	1
Pl	2016-11-24	midday	x	o	o	l	1
Pl	2016-11-24	midday	o	o	x	m	0
Pl	2016-11-24	midday	x	o	o	l	1
Pl	2016-11-24	midday	x	o	o	m	0
Pl	2016-11-24	midday	o	o	x	r	1
Hy	2016-09-07	afternoon	o	o	x	m	0
Hy	2016-09-07	afternoon	x	o	o	l	1
Hy	2016-09-07	afternoon	o	o	x	m	0
Hy	2016-09-07	afternoon	o	x	o	r	0
Hy	2016-09-07	afternoon	x	o	o	l	1
Hy	2016-09-07	afternoon	o	o	x	r	1
Hy	2016-09-07	afternoon	o	x	o	m	1
Hy	2016-09-07	afternoon	o	o	x	r	1
Hy	2016-09-07	afternoon	x	o	o	r	0
Hy	2016-09-07	afternoon	o	o	x	m	0
Hy	2016-09-07	afternoon	x	o	o	r	0
Hy	2016-09-07	afternoon	o	x	o	l	0
Hy	2016-09-07	afternoon	o	o	x	r	1
Hy	2016-09-07	afternoon	o	x	o	l	0
Hy	2016-09-07	afternoon	x	o	o	m	0
Hy	2016-09-07	afternoon	o	o	x	r	1
Hy	2016-09-07	afternoon	o	x	o	l	0
Hy	2016-09-07	afternoon	x	o	o	m	0
Hy	2016-09-07	afternoon	o	o	x	r	1
Hy	2016-09-07	afternoon	o	x	o	l	0
Hy	2016-09-09	afternoon	o	o	x	m	0
Hy	2016-09-09	afternoon	x	o	o	r	0
Hy	2016-09-09	afternoon	o	x	o	m	1
Hy	2016-09-09	afternoon	o	x	o	l	0
Hy	2016-09-09	afternoon	o	o	x	r	1
Hy	2016-09-09	afternoon	o	o	x	r	1
Hy	2016-09-09	afternoon	x	o	o	m	0
Hy	2016-09-09	afternoon	o	o	x	l	0
Hy	2016-09-09	afternoon	o	x	o	r	0
Hy	2016-09-09	afternoon	o	o	x	m	0
