# Supplementary material for: Dogs can be trained to find a bar magnet
Source: PeerJ. 2018 Dec 17;6:e6117. doi: 10.7717/peerj.6117 (PMC6301327; doi:10.7717/peerj.6117)
Supplement: Supplemental Information 2 [file peerj-06-6117-s002.xlsx]

## Sheet: Tabelle1
dog	date	time	left	middle	right	chosen position	correct choice
Dt	2016-06-21	evening	x	o	o	r	0		dog : abbreviation of the dog's name
Dt	2016-06-21	evening	o	x	o	r	0		date : when the test was performed
Dt	2016-06-21	evening	x	o	o	l	1		time : when the test was performed (early morning= 3:00h-6:00h; morning= 6:00h-9:00h; mid morning= 9:00h-12:00h; midday= 12:00h-15:00h; afternoon= 15:00h-18:00h; evening= 18:00h-21:00h)
Dt	2016-06-21	evening	x	o	o	m	0		left/middle/right: position of the jars (o= dummy objects; x= food treat)
Dt	2016-07-05	evening	o	o	x	m	0		chosen position: which jar was chosen by the dog (l= left; m=middle; r= right)
Dt	2016-07-05	evening	o	o	x	l	0		correct choice: 0= when dog chose one of the dummy objects; 1= when dog chose the food treat
Dt	2016-07-05	evening	o	x	o	m	1
Dt	2016-07-05	evening	o	x	o	m	1
Dt	2016-07-05	evening	x	o	o	r	0
Dt	2016-07-19	evening	x	o	o	l	1
Dt	2016-07-19	evening	o	o	x	l	0
Dt	2016-07-19	evening	o	x	o	l	0
Dt	2016-07-19	evening	x	o	o	r	0
Dt	2016-08-02	evening	o	x	o	m	1
Dt	2016-08-02	evening	o	o	x	m	0
Dt	2016-08-02	evening	x	o	o	r	0
Dt	2016-08-02	evening	o	o	x	l	0
Dt	2016-08-02	evening	o	x	o	m	1
Dt	2016-08-02	evening	o	o	x	m	0
Dt	2016-08-02	evening	o	x	o	l	0
Dt	2016-08-02	evening	x	o	o	m	0
Dt	2016-08-02	evening	o	o	x	l	0
Dt	2016-08-02	evening	o	x	o	m	1
Dt	2016-08-16	evening	x	o	o	r	0
Dt	2016-08-16	evening	o	o	x	m	0
Dt	2016-08-16	evening	o	o	x	m	0
Dt	2016-08-16	evening	x	o	o	m	0
Dt	2016-08-16	evening	o	x	o	m	1
Dt	2016-08-16	evening	o	o	x	r	1
Dt	2016-08-16	evening	o	x	o	m	1
Sy	2016-04-29	evening	x	o	o	m	0
Sy	2016-04-29	evening	o	x	o	m	1
Sy	2016-04-29	evening	o	o	x	m	0
Sy	2016-04-29	evening	x	o	o	r	0
Sy	2016-04-29	evening	o	x	o	r	0
Sy	2016-05-13	morning	o	o	x	l	0
Sy	2016-05-13	morning	x	o	o	l	1
Sy	2016-05-13	morning	o	x	o	m	1
Sy	2016-05-13	morning	o	o	x	m	0
Sy	2016-05-13	morning	x	o	o	m	0
Sy	2016-05-25	early morning	o	x	o	m	1
Sy	2016-05-25	early morning	o	o	x	l	0
Sy	2016-05-25	early morning	x	o	o	l	1
Sy	2016-05-25	early morning	o	x	o	r	0
Sy	2016-05-25	early morning	o	o	x	m	0
Sy	2016-05-29	evening	x	o	o	m	0
Sy	2016-05-29	evening	o	x	o	m	1
Sy	2016-05-29	evening	o	o	x	r	1
Sy	2016-05-29	evening	x	o	o	m	0
Sy	2016-05-29	evening	o	x	o	l	0
Sy	2016-06-04	afternoon	o	o	x	m	0
Sy	2016-06-04	afternoon	x	o	o	l	1
Sy	2016-06-04	afternoon	o	x	o	m	1
Sy	2016-06-04	afternoon	o	o	x	l	0
Sy	2016-06-04	afternoon	x	o	o	m	0
Sy	2016-06-18	afternoon	o	x	o	l	0
Sy	2016-06-18	afternoon	o	o	x	l	0
Sy	2016-06-18	afternoon	x	o	o	m	0
Sy	2016-06-18	afternoon	o	x	o	r	0
Sy	2016-06-18	evening	o	o	x	m	0
Jy	2016-04-29	evening	x	o	o	l	1
Jy	2016-04-29	evening	o	x	o	l	0
Jy	2016-04-29	evening	o	o	x	r	1
Jy	2016-04-29	evening	x	o	o	m	0
Jy	2016-04-29	evening	o	x	o	m	1
Jy	2016-05-13	morning	o	o	x	m	0
Jy	2016-05-13	morning	x	o	o	m	0
Jy	2016-05-13	morning	o	x	o	r	0
Jy	2016-05-13	morning	o	o	x	r	1
Jy	2016-05-13	morning	x	o	o	l	1
Jy	2016-05-25	early morning	o	x	o	l	0
Jy	2016-05-25	early morning	o	o	x	m	0
Jy	2016-05-25	early morning	x	o	o	m	0
Jy	2016-05-25	early morning	o	x	o	m	1
Jy	2016-05-25	early morning	o	o	x	m	0
Jy	2016-05-29	evening	x	o	o	l	1
Jy	2016-05-29	evening	o	x	o	m	1
Jy	2016-05-29	evening	o	o	x	l	0
Jy	2016-05-29	evening	x	o	o	r	0
Jy	2016-05-29	evening	o	x	o	r	0
Jy	2016-06-04	afternoon	o	o	x	m	0
Jy	2016-06-04	afternoon	x	o	o	l	1
Jy	2016-06-04	afternoon	o	x	o	m	1
Jy	2016-06-04	afternoon	o	o	x	m	0
Jy	2016-06-04	evening	x	o	o	l	1
Jy	2016-06-18	evening	o	x	o	l	0
Jy	2016-06-18	evening	o	o	x	m	0
Jy	2016-06-18	evening	x	o	o	r	0
Jy	2016-06-18	evening	o	x	o	m	1
Jy	2016-06-18	evening	o	o	x	m	0
Hy	2016-04-04	midday	o	o	x	m	0
Hy	2016-04-04	midday	o	x	o	r	0
Hy	2016-04-04	midday	x	o	o	r	0
Hy	2016-04-04	midday	o	o	x	m	0
Hy	2016-04-04	midday	o	x	o	l	0
Hy	2016-04-04	midday	o	o	x	r	1
Hy	2016-04-04	midday	x	o	o	r	0
Hy	2016-04-04	midday	o	o	x	r	1
Hy	2016-04-04	midday	o	x	o	r	0
Hy	2016-04-04	midday	x	o	o	r	0
Hy	2016-04-07	afternoon	o	x	o	r	0
Hy	2016-04-07	afternoon	o	o	x	m	0
Hy	2016-04-07	afternoon	x	o	o	l	1
Hy	2016-04-07	afternoon	o	x	o	m	1
Hy	2016-04-07	afternoon	x	o	o	r	0
Hy	2016-04-07	afternoon	o	o	x	m	0
Hy	2016-04-07	afternoon	o	x	o	m	1
Hy	2016-04-07	afternoon	o	x	o	m	1
Hy	2016-04-07	afternoon	o	o	x	m	0
Hy	2016-04-07	afternoon	o	o	x	m	0
Hy	2016-04-07	afternoon	x	o	o	r	0
Hy	2016-04-07	afternoon	o	o	x	m	0
Hy	2016-04-07	afternoon	o	x	o	l	0
Hy	2016-04-07	afternoon	o	x	o	l	0
Hy	2016-04-07	afternoon	x	o	o	m	0
Hy	2016-04-07	afternoon	x	o	o	r	0
Hy	2016-04-07	afternoon	o	o	x	l	0
Hy	2016-04-07	afternoon	o	x	o	l	0
Hy	2016-04-07	afternoon	x	o	o	m	0
Hy	2016-04-07	afternoon	o	o	x	r	1
Ya	2016-07-26	afternoon	x	o	o	l	1
Ya	2016-07-26	afternoon	o	o	x	m	0
Ya	2016-07-26	afternoon	x	o	o	m	0
Ya	2016-07-26	afternoon	o	o	x	m	0
Ya	2016-07-26	afternoon	o	x	o	l	0
Ya	2016-08-02	afternoon	o	x	o	r	0
Ya	2016-08-02	afternoon	o	x	o	m	1
Ya	2016-08-02	afternoon	x	o	o	r	0
Ya	2016-08-02	afternoon	o	x	o	l	0
Ya	2016-08-02	afternoon	o	o	x	l	0
Ya	2016-08-02	afternoon	o	x	o	m	1
Ya	2016-08-09	afternoon	o	x	o	r	0
Ya	2016-08-09	afternoon	x	o	o	l	1
Ya	2016-08-09	afternoon	o	o	x	l	0
Ya	2016-08-09	afternoon	o	x	o	r	0
Ya	2016-08-09	afternoon	x	o	o	l	1
Ya	2016-08-09	afternoon	o	o	x	m	0
Ya	2016-08-16	afternoon	o	x	o	m	1
Ya	2016-08-16	afternoon	o	o	x	r	1
Ya	2016-08-16	afternoon	o	o	x	l	0
Ya	2016-08-16	afternoon	x	o	o	l	1
Ya	2016-08-16	afternoon	o	o	x	m	0
Ya	2016-08-23	afternoon	x	o	o	l	1
Ya	2016-08-23	afternoon	o	x	o	l	0
Ya	2016-08-23	afternoon	x	o	o	l	1
Ya	2016-08-23	afternoon	o	x	o	l	0
Ya	2016-08-23	afternoon	o	o	x	m	0
Ya	2016-08-23	afternoon	o	o	x	m	0
Ya	2016-08-23	afternoon	x	o	o	m	0
Ya	2016-08-23	afternoon	o	o	x	m	0
Mx	2016-08-09	evening	o	x	o	l	0
Mx	2016-08-09	evening	o	o	x	m	0
Mx	2016-08-09	evening	o	x	o	l	0
Mx	2016-08-09	evening	x	o	o	l	1
Mx	2016-08-09	evening	x	o	o	l	1
Mx	2016-08-09	evening	o	o	x	l	0
Mx	2016-08-09	evening	o	x	o	l	0
Mx	2016-08-09	evening	o	x	o	r	0
Mx	2016-08-09	evening	x	o	o	m	0
Mx	2016-08-09	evening	o	o	x	r	1
Mx	2016-08-09	evening	o	x	o	r	0
Mx	2016-08-09	evening	x	o	o	l	1
Mx	2016-08-09	evening	o	o	x	m	0
Mx	2016-08-09	evening	x	o	o	l	1
Mx	2016-08-09	evening	o	o	x	m	0
Mx	2016-08-09	evening	o	o	x	r	1
Mx	2016-08-16	evening	o	x	o	l	0
Mx	2016-08-16	evening	o	o	x	l	0
Mx	2016-08-16	evening	x	o	o	l	1
Mx	2016-08-16	evening	o	x	o	r	0
Mx	2016-08-16	evening	o	x	o	l	0
Mx	2016-08-16	evening	x	o	o	l	1
Mx	2016-08-16	evening	x	o	o	l	1
Mx	2016-08-16	evening	o	o	x	m	0
Mx	2016-08-16	evening	o	x	o	m	1
Mx	2016-08-23	evening	o	o	x	m	0
Mx	2016-08-23	evening	x	o	o	m	0
Mx	2016-08-23	evening	x	o	o	l	1
Mx	2016-08-23	evening	o	x	o	r	0
Mx	2016-08-23	evening	o	o	x	l	0
Ts	2016-08-09	afternoon	o	o	x	r	1
Ts	2016-08-09	afternoon	o	x	o	m	1
Ts	2016-08-09	afternoon	x	o	o	m	0
Ts	2016-08-09	afternoon	o	o	x	m	0
Ts	2016-08-09	afternoon	x	o	o	m	0
Ts	2016-08-09	afternoon	x	o	o	m	0
Ts	2016-08-09	afternoon	o	x	o	l	0
Ts	2016-08-16	afternoon	o	x	o	l	0
Ts	2016-08-16	afternoon	o	o	x	m	0
Ts	2016-08-16	afternoon	o	x	o	m	1
Ts	2016-08-16	afternoon	x	o	o	m	0
Ts	2016-08-16	afternoon	x	o	o	l	1
Ts	2016-08-16	afternoon	o	o	x	m	0
Ts	2016-08-23	afternoon	o	x	o	l	0
Ts	2016-08-23	afternoon	x	o	o	m	0
Ts	2016-08-23	afternoon	o	o	x	l	0
Ts	2016-08-23	afternoon	o	x	o	r	0
Ts	2016-08-23	afternoon	o	x	o	m	1
Ts	2016-08-23	afternoon	o	o	x	l	0
Ts	2016-08-23	afternoon	o	x	o	l	0
Ts	2016-08-23	afternoon	x	o	o	l	1
Ts	2016-08-30	afternoon	o	o	x	m	0
Ts	2016-08-30	afternoon	x	o	o	m	0
Ts	2016-08-30	afternoon	o	x	o	m	1
Ts	2016-08-30	afternoon	o	o	x	r	1
Ts	2016-08-30	afternoon	o	o	x	l	0
Ts	2016-08-30	afternoon	x	o	o	l	1
Ts	2016-08-30	afternoon	o	o	x	m	0
Ts	2016-08-30	afternoon	x	o	o	r	0
Ts	2016-08-30	afternoon	o	x	o	l	0
Gy	2016-10-04	evening	o	o	x	r	1
Gy	2016-10-04	evening	x	o	o	l	1
Gy	2016-10-04	evening	o	o	x	l	0
Gy	2016-10-04	evening	o	x	o	r	0
Gy	2016-10-04	evening	o	o	x	m	0
Gy	2016-10-18	evening	o	o	x	l	0
Gy	2016-10-18	evening	x	o	o	l	1
Gy	2016-10-18	evening	o	x	o	l	0
Gy	2016-10-18	evening	o	o	x	r	1
Gy	2016-10-18	evening	o	x	o	l	0
Gy	2016-10-18	evening	x	o	o	r	0
Gy	2016-10-18	evening	o	x	o	l	0
Gy	2016-10-18	evening	o	o	x	l	0
Gy	2016-10-25	evening	o	o	x	l	0
Gy	2016-10-25	evening	x	o	o	m	0
Gy	2016-10-25	evening	o	o	x	l	0
Gy	2016-10-25	evening	o	x	o	l	0
Gy	2016-10-25	evening	o	x	o	m	1
Gy	2016-10-25	evening	x	o	o	l	1
Gy	2016-10-25	evening	x	o	o	r	0
Gy	2016-10-25	evening	o	x	o	l	0
Gy	2016-10-25	evening	x	o	o	r	0
Gy	2016-10-25	evening	x	o	o	l	1
Gy	2016-10-25	evening	o	o	x	r	1
Gy	2016-10-25	evening	o	x	o	m	1
Gy	2016-10-25	evening	x	o	o	r	0
Gy	2016-10-25	evening	o	x	o	r	0
Gy	2016-10-25	evening	o	o	x	r	1
Gy	2016-10-25	evening	x	o	o	l	1
Gy	2016-10-25	evening	o	x	o	l	0
Fi	2016-10-18	afternoon	o	o	x	r	1
Fi	2016-10-18	afternoon	x	o	o	m	0
Fi	2016-10-18	afternoon	o	x	o	m	1
Fi	2016-10-18	afternoon	x	o	o	m	0
Fi	2016-10-18	afternoon	o	x	o	r	0
Fi	2016-10-18	afternoon	x	o	o	l	1
Fi	2016-10-18	afternoon	o	x	o	r	0
Fi	2016-10-18	afternoon	x	o	o	m	0
Fi	2016-10-18	afternoon	o	o	x	m	0
Fi	2016-10-18	afternoon	o	x	o	l	0
Fi	2016-10-18	afternoon	x	o	o	l	1
Fi	2016-10-18	afternoon	o	x	o	l	0
Fi	2016-10-18	afternoon	o	o	x	r	1
Fi	2016-10-18	afternoon	x	o	o	l	1
Fi	2016-10-18	afternoon	o	o	x	m	0
Fi	2016-10-25	afternoon	x	o	o	m	0
Fi	2016-10-25	afternoon	o	o	x	m	0
Fi	2016-10-25	afternoon	o	o	x	m	0
Fi	2016-10-25	afternoon	o	x	o	r	0
Fi	2016-10-25	evening	x	o	o	l	1
Fi	2016-10-25	evening	o	o	x	r	1
Fi	2016-10-25	evening	o	x	o	m	1
Fi	2016-10-25	evening	x	o	o	l	1
Fi	2016-10-25	evening	o	o	x	m	0
Fi	2016-10-25	evening	o	o	x	m	0
Fi	2016-10-25	evening	x	o	o	l	1
Fi	2016-10-25	evening	o	o	x	m	0
Fi	2016-10-25	evening	o	x	o	m	1
Fi	2016-10-25	evening	o	x	o	l	0
Fi	2016-10-25	evening	x	o	o	r	0
Ly	2016-10-11	evening	o	o	x	m	0
Ly	2016-10-11	evening	x	o	o	l	1
Ly	2016-10-11	evening	o	o	x	m	0
Ly	2016-10-11	evening	o	x	o	m	1
Ly	2016-10-11	evening	o	o	x	m	0
Ly	2016-10-11	evening	x	o	o	l	1
Ly	2016-10-11	evening	o	x	o	r	0
Ly	2016-10-11	evening	o	o	x	m	0
Ly	2016-10-11	evening	o	x	o	m	1
Ly	2016-10-11	evening	x	o	o	l	1
Ly	2016-10-11	evening	x	o	o	r	0
Ly	2016-10-11	evening	o	o	x	m	0
Ly	2016-10-25	evening	o	o	x	m	0
Ly	2016-10-25	evening	x	o	o	m	0
Ly	2016-10-25	evening	o	x	o	m	1
Ly	2016-10-25	evening	o	o	x	l	0
Ly	2016-10-25	evening	o	x	o	m	1
Ly	2016-10-25	evening	o	o	x	m	0
Ly	2016-10-25	evening	x	o	o	r	0
Ly	2016-10-25	evening	o	x	o	r	0
Ly	2016-10-25	evening	x	o	o	r	0
Ly	2016-10-25	evening	o	o	x	m	0
Ly	2016-10-25	evening	x	o	o	l	1
Ly	2016-10-25	evening	o	x	o	m	1
Ly	2016-10-25	evening	x	o	o	m	0
Ly	2016-10-25	evening	o	o	x	r	1
Ly	2016-10-25	evening	x	o	o	r	0
Ly	2016-10-25	evening	o	x	o	m	1
Ly	2016-10-25	evening	o	x	o	l	0
Ly	2016-10-25	evening	o	o	x	r	1
Ka	2016-10-28	afternoon	o	o	x	r	1
Ka	2016-10-28	afternoon	x	o	o	m	0
Ka	2016-10-28	afternoon	o	x	o	r	0
Ka	2016-10-28	afternoon	x	o	o	m	0
Ka	2016-10-28	afternoon	o	o	x	m	0
Ka	2016-10-28	afternoon	o	x	o	m	1
Ka	2016-10-28	afternoon	x	o	o	m	0
Ka	2016-10-28	afternoon	x	o	o	r	0
Ka	2016-10-28	afternoon	o	x	o	m	1
Ka	2016-10-30	midday	o	o	x	m	0
Ka	2016-10-30	midday	x	o	o	m	0
Ka	2016-10-30	midday	o	x	o	l	0
Ka	2016-10-30	midday	o	o	x	l	0
Ka	2016-10-30	midday	o	x	o	m	1
Ka	2016-10-30	midday	o	x	o	m	1
Ka	2016-10-30	midday	x	o	o	r	0
Ka	2016-10-30	midday	o	x	o	r	0
Ka	2016-10-30	midday	o	o	x	m	0
Ka	2016-10-30	midday	x	o	o	m	0
Ka	2016-10-30	midday	o	x	o	m	1
Ka	2016-10-30	midday	x	o	o	m	0
Ka	2016-10-30	midday	o	o	x	l	0
Ka	2016-10-30	midday	o	x	o	m	1
Ka	2016-10-30	midday	o	o	x	m	0
Ka	2016-10-30	midday	o	o	x	m	0
Ka	2016-10-30	midday	x	o	o	l	1
Ka	2016-10-30	midday	o	o	x	m	0
Ka	2016-10-30	midday	o	x	o	m	1
Ka	2016-10-30	midday	x	o	o	m	0
Ka	2016-10-30	midday	o	o	x	r	1
Bi	2016-10-28	afternoon	x	o	o	m	0
Bi	2016-10-28	afternoon	o	o	x	r	1
Bi	2016-10-28	afternoon	o	x	o	m	1
Bi	2016-10-28	afternoon	x	o	o	m	0
Bi	2016-10-28	afternoon	o	x	o	r	0
Bi	2016-10-28	afternoon	o	o	x	l	0
Bi	2016-10-28	afternoon	x	o	o	m	0
Bi	2016-10-28	afternoon	x	o	o	l	1
Bi	2106-10-30	mid morning	o	o	x	m	0
Bi	2106-10-30	mid morning	x	o	o	l	1
Bi	2106-10-30	mid morning	o	o	x	m	0
Bi	2106-10-30	mid morning	o	x	o	m	1
Bi	2106-10-30	mid morning	o	o	x	l	0
Bi	2106-10-30	mid morning	x	o	o	r	0
Bi	2106-10-30	mid morning	o	x	o	l	0
Bi	2106-10-30	midday	o	o	x	l	0
Bi	2106-10-30	midday	o	x	o	m	1
Bi	2106-10-30	midday	x	o	o	m	0
Bi	2106-10-30	midday	o	o	x	r	1
Bi	2106-10-30	midday	o	x	o	m	1
Bi	2106-10-30	midday	x	o	o	m	0
Bi	2106-10-30	midday	x	o	o	l	1
Bi	2106-10-30	midday	o	x	o	l	0
Bi	2106-10-30	midday	o	x	o	l	0
Bi	2106-10-30	midday	o	o	x	l	0
Bi	2106-10-30	midday	o	x	o	l	0
Bi	2106-10-30	midday	o	o	x	r	1
Bi	2106-10-30	midday	o	x	o	l	0
Bi	2106-10-30	midday	o	o	x	m	0
Bi	2106-10-30	midday	x	o	o	l	1
Ca	2016-10-30	mid morning	o	o	x	l	0
Ca	2016-10-30	mid morning	o	x	o	r	0
Ca	2016-10-30	mid morning	x	o	o	l	1
Ca	2016-10-30	midday	x	o	o	l	1
Ca	2016-10-30	midday	o	o	x	m	0
Ca	2016-10-30	midday	o	x	o	m	1
Ca	2016-10-30	midday	o	o	x	m	0
Ca	2016-10-30	midday	x	o	o	m	0
Ca	2016-10-30	midday	o	o	x	r	1
Ca	2016-10-30	midday	o	x	o	m	1
Ca	2016-10-30	midday	x	o	o	m	0
Ca	2016-10-30	midday	o	o	x	m	0
Ca	2016-10-30	midday	x	o	o	r	0
Ca	2016-10-30	midday	o	x	o	l	0
Ca	2016-10-30	midday	o	x	o	l	0
Ca	2016-10-30	midday	x	o	o	m	0
Ca	2016-10-30	midday	o	o	x	r	1
Ca	2016-10-30	midday	x	o	o	m	0
Ca	2016-10-30	midday	o	o	x	l	0
Ca	2016-10-30	midday	o	x	o	r	0
Ca	2016-11-01	mid morning	o	x	o	m	1
Ca	2016-11-01	mid morning	x	o	o	m	0
Ca	2016-11-01	mid morning	o	o	x	l	0
Ca	2016-11-01	mid morning	o	x	o	r	0
Ca	2016-11-01	mid morning	o	o	x	l	0
Ca	2016-11-01	mid morning	x	o	o	m	0
Ca	2016-11-01	mid morning	o	x	o	m	1
Ca	2016-11-01	mid morning	x	o	o	r	0
Ca	2016-11-01	mid morning	o	o	x	r	1
Ca	2016-11-01	mid morning	o	x	o	r	0
Kr	2016-11-22	afternoon	x	o	o	m	0
Kr	2016-11-22	afternoon	o	x	o	m	1
Kr	2016-11-22	afternoon	o	o	x	m	0
Kr	2016-11-22	afternoon	o	o	x	l	0
Kr	2016-11-22	afternoon	x	o	o	l	1
Kr	2016-11-22	afternoon	o	o	x	m	0
Kr	2016-11-22	afternoon	o	x	o	m	1
Kr	2016-11-22	afternoon	x	o	o	r	0
Kr	2016-11-22	afternoon	o	o	x	m	0
Kr	2016-11-22	afternoon	x	o	o	l	1
Kr	2016-11-25	afternoon	o	o	x	m	0
Kr	2016-11-25	afternoon	x	o	o	m	0
Kr	2016-11-25	afternoon	o	x	o	m	1
Kr	2016-11-25	afternoon	o	x	o	l	0
Kr	2016-11-25	afternoon	o	o	x	l	0
Kr	2016-11-25	afternoon	o	x	o	m	1
Kr	2016-11-25	afternoon	x	o	o	r	0
Kr	2016-11-25	afternoon	o	o	x	l	0
Kr	2016-11-25	afternoon	x	o	o	m	0
Kr	2016-11-25	afternoon	o	x	o	m	1
Kr	2016-11-28	afternoon	o	o	x	l	0
Kr	2016-11-28	afternoon	o	x	o	m	1
Kr	2016-11-28	afternoon	o	x	o	l	0
Kr	2016-11-28	afternoon	x	o	o	m	0
Kr	2016-11-28	afternoon	o	o	x	l	0
Kr	2016-11-28	afternoon	o	x	o	m	1
Kr	2016-11-28	afternoon	x	o	o	m	0
Kr	2016-11-28	afternoon	o	x	o	r	0
Kr	2016-11-28	afternoon	o	o	x	l	0
Kr	2016-11-28	afternoon	x	o	o	m	0
Pl	2016-12-15	midday	o	o	x	l	0
Pl	2016-12-15	midday	o	x	o	l	0
Pl	2016-12-15	midday	o	o	x	m	0
Pl	2016-12-15	midday	x	o	o	r	0
Pl	2016-12-15	midday	o	x	o	m	1
Pl	2016-12-15	midday	x	o	o	m	0
Pl	2016-12-15	midday	o	o	x	l	0
Pl	2016-12-15	midday	o	o	x	r	1
Pl	2016-12-15	midday	o	x	o	r	0
Pl	2016-12-15	midday	o	o	x	m	0
Pl	2016-12-15	midday	x	o	o	r	0
Pl	2016-12-15	midday	o	x	o	m	1
Pl	2016-12-15	midday	x	o	o	m	0
Pl	2016-12-15	midday	x	o	o	r	0
Pl	2016-12-18	midday	o	o	x	r	1
Pl	2016-12-18	midday	o	x	o	m	1
Pl	2016-12-18	midday	x	o	o	r	0
Pl	2016-12-18	midday	o	x	o	r	0
Pl	2016-12-18	midday	x	o	o	m	0
Pl	2016-12-18	midday	o	x	o	r	0
Pl	2016-12-18	midday	o	o	x	m	0
Pl	2016-12-18	midday	o	o	x	m	0
Pl	2016-12-18	midday	o	x	o	m	1
Pl	2016-12-18	midday	x	o	o	r	0
Pl	2016-12-18	midday	o	o	x	r	1
Pl	2016-12-18	midday	o	x	o	r	0
Pl	2016-12-18	midday	x	o	o	r	0
Pl	2016-12-18	midday	o	x	o	m	1
Pl	2016-12-18	midday	x	o	o	m	0
Pl	2016-12-18	midday	o	o	x	r	1
Pa	2016-03-26	afternoon	o	x	o	m	1
Pa	2016-03-26	afternoon	o	o	x	m	0
Pa	2016-03-26	afternoon	x	o	o	m	0
Pa	2016-03-26	afternoon	o	o	x	r	1
Pa	2016-03-26	afternoon	o	x	o	r	0
Pa	2016-03-26	afternoon	o	o	x	r	1
Pa	2016-03-26	afternoon	x	o	o	r	0
Pa	2016-03-26	afternoon	o	o	x	r	1
Pa	2016-03-26	afternoon	o	x	o	r	0
Pa	2016-03-26	afternoon	x	o	o	r	0
Pa	2016-03-26	afternoon	o	o	x	m	0
Pa	2016-03-26	afternoon	o	x	o	m	1
Pa	2016-03-26	afternoon	o	x	o	m	1
Pa	2016-03-26	afternoon	o	o	x	m	0
Pa	2016-03-26	afternoon	x	o	o	m	0
Pa	2016-03-26	afternoon	o	x	o	l	0
Pa	2016-03-26	afternoon	o	o	x	l	0
Pa	2016-03-26	afternoon	x	o	o	m	0
Pa	2016-03-26	afternoon	o	x	o	r	0
Pa	2016-03-26	afternoon	x	o	o	m	0
Pa	2016-04-03	evening	o	o	x	m	0
Pa	2016-04-03	evening	x	o	o	r	0
Pa	2016-04-03	evening	o	x	o	l	0
Pa	2016-04-03	evening	x	o	o	m	0
Pa	2016-04-03	evening	o	o	x	m	0
Pa	2016-04-03	evening	o	x	o	l	0
Pa	2016-04-03	evening	o	o	x	m	0
Pa	2016-04-03	evening	x	o	o	r	0
Pa	2016-04-03	evening	o	x	o	m	1
Pa	2016-04-03	evening	o	o	x	m	0
