# Supplementary material for: Dogs can be trained to find a bar magnet
Source: PeerJ. 2018 Dec 17;6:e6117. doi: 10.7717/peerj.6117 (PMC6301327; doi:10.7717/peerj.6117)
Supplement: Supplemental Information 4 [file peerj-06-6117-s004.xlsx]

## Sheet: Tabelle1
dog	date	time	object	left	middle	right	chosen	1/0
Hy	2016-03-25	afternoon	Food treat	o	o	x	r	1		dog : abbreviation of the dog's name
Hy	2016-03-25	afternoon	Food treat	o	x	o	m	1		date : when the test was performed
Hy	2016-03-25	afternoon	Food treat	x	o	o	l	1		time : when the test was performed (early morning= 3:00h-6:00h; morning= 6:00h-9:00h; mid morning= 9:00h-12:00h; midday= 12:00h-15:00h; afternoon= 15:00h-18:00h; evening= 18:00h-21:00h)
Hy	2016-03-25	afternoon	Food treat	o	x	o	m	1		left/middle/right: position of the jars (o= dummy objects; x= food treat)
Hy	2016-03-25	afternoon	Food treat	x	o	o	l	1		chosen position: which jar was chosen by the dog (l= left; m=middle; r= right)
Hy	2016-03-25	afternoon	Food treat	o	o	x	r	1		correct choice: 0= when dog chose one of the dummy objects; 1= when dog chose the food treat
Hy	2016-03-25	afternoon	Food treat	o	o	x	r	1
Hy	2016-03-25	afternoon	Food treat	o	x	o	m	1
Hy	2016-03-25	afternoon	Food treat	x	o	o	l	1
Hy	2016-03-25	afternoon	Food treat	o	o	x	r	1
Hy	2016-03-25	afternoon	Food treat	o	x	o	l	0
Hy	2016-03-25	afternoon	Food treat	o	o	x	r	1
Hy	2016-03-25	afternoon	Food treat	x	o	o	l	1
Hy	2016-03-25	afternoon	Food treat	o	o	x	r	1
Hy	2016-03-25	afternoon	Food treat	o	x	o	m	1
Hy	2016-04-04	midday	Food treat	o	o	x	r	1
Hy	2016-04-04	midday	Food treat	o	o	x	r	1
Hy	2016-04-04	midday	Food treat	o	x	o	m	1
Hy	2016-04-04	midday	Food treat	x	o	o	l	1
Hy	2016-04-04	midday	Food treat	o	x	o	m	1
Hy	2016-04-04	midday	Food treat	o	o	x	r	1
Hy	2016-04-04	midday	Food treat	x	o	o	m	0
Hy	2016-04-04	midday	Food treat	o	o	x	r	1
Hy	2016-04-04	midday	Food treat	o	x	o	m	1
Hy	2016-04-04	midday	Food treat	x	o	o	l	1
Hy	2016-04-04	midday	Food treat	x	o	o	l	1
Hy	2016-04-04	midday	Food treat	o	o	x	r	1
Hy	2016-04-04	midday	Food treat	x	o	o	m	0
Hy	2016-04-04	midday	Food treat	o	x	o	m	1
Hy	2016-04-04	midday	Food treat	o	o	x	r	1
Pa	2016-03-26	afternoon	Food treat	o	o	x	r	1
Pa	2016-03-26	afternoon	Food treat	o	x	o	m	1
Pa	2016-03-26	afternoon	Food treat	x	o	o	m	0
Pa	2016-03-26	afternoon	Food treat	o	x	o	m	1
Pa	2016-03-26	afternoon	Food treat	x	o	o	l	1
Pa	2016-03-26	afternoon	Food treat	o	o	x	r	1
Pa	2016-03-26	afternoon	Food treat	o	o	x	r	1
Pa	2016-03-26	afternoon	Food treat	o	x	o	m	1
Pa	2016-03-26	afternoon	Food treat	x	o	o	m	0
Pa	2016-03-26	afternoon	Food treat	o	o	x	r	1
Pa	2016-03-26	afternoon	Food treat	o	x	o	m	1
Pa	2016-03-26	afternoon	Food treat	o	o	x	r	1
Pa	2016-03-26	afternoon	Food treat	x	o	o	l	1
Pa	2016-03-26	afternoon	Food treat	o	o	x	r	1
Pa	2016-03-26	afternoon	Food treat	o	x	o	r	0
Pa	2016-04-03	evening	Food treat	o	o	x	r	1
Pa	2016-04-03	evening	Food treat	x	o	o	l	1
Pa	2016-04-03	evening	Food treat	o	o	x	r	1
Pa	2016-04-03	evening	Food treat	o	o	x	r	1
Pa	2016-04-03	evening	Food treat	x	o	o	m	0
Pa	2016-04-03	evening	Food treat	o	x	o	m	1
Pa	2016-04-03	evening	Food treat	o	x	o	m	1
Pa	2016-04-03	evening	Food treat	x	o	o	l	1
Pa	2016-04-03	evening	Food treat	o	x	o	m	1
Pa	2016-04-03	evening	Food treat	o	o	x	r	1
Pa	2016-04-03	evening	Food treat	o	x	o	m	1
Pa	2016-04-03	evening	Food treat	x	o	o	l	1
Pa	2016-04-03	evening	Food treat	x	o	o	l	1
Pa	2016-04-03	evening	Food treat	o	x	o	m	1
Pa	2016-04-03	evening	Food treat	o	o	x	r	1
Bi	2016-11-20	midday	Food treat	x	o	o	l	1
Bi	2016-11-20	midday	Food treat	o	o	x	r	1
Bi	2016-11-20	midday	Food treat	x	o	o	l	1
Bi	2016-11-20	midday	Food treat	o	x	o	r	0
Bi	2016-11-20	midday	Food treat	o	o	x	m	0
Bi	2016-11-20	midday	Food treat	o	o	x	r	1
Bi	2016-11-20	midday	Food treat	o	x	o	m	1
Bi	2016-11-20	midday	Food treat	x	o	o	l	1
Bi	2016-11-20	midday	Food treat	o	x	o	m	1
Bi	2016-11-20	midday	Food treat	o	o	x	r	1
Bi	2016-11-20	midday	Food treat	x	o	o	l	1
Bi	2016-11-20	midday	Food treat	o	x	o	m	1
Bi	2016-11-20	midday	Food treat	x	o	o	m	0
Bi	2016-11-20	midday	Food treat	o	o	x	r	1
Bi	2016-11-20	midday	Food treat	o	x	o	m	1
Bi	2016-11-27	midday	Food treat	o	x	o	m	1
Bi	2016-11-27	midday	Food treat	o	o	x	r	1
Bi	2016-11-27	midday	Food treat	x	o	o	l	1
Bi	2016-11-27	midday	Food treat	o	o	x	r	1
Bi	2016-11-27	midday	Food treat	x	o	o	l	1
Bi	2016-11-27	midday	Food treat	o	x	o	r	0
Bi	2016-11-27	midday	Food treat	o	o	x	r	1
Bi	2016-11-27	midday	Food treat	x	o	o	l	1
Bi	2016-11-27	midday	Food treat	o	x	o	m	1
Bi	2016-11-27	midday	Food treat	x	o	o	r	0
Bi	2016-11-27	midday	Food treat	o	o	x	r	1
Bi	2016-11-27	midday	Food treat	x	o	o	l	1
Bi	2016-11-27	midday	Food treat	o	x	o	m	1
Bi	2016-11-27	midday	Food treat	o	o	x	r	1
Bi	2016-11-27	midday	Food treat	o	x	o	m	1
Pl	2018-02-26	afternoon	Food treat	x	o	o	l	1
Pl	2018-02-26	afternoon	Food treat	o	o	x	r	1
Pl	2018-02-26	afternoon	Food treat	x	o	o	l	1
Pl	2018-02-26	afternoon	Food treat	o	x	o	m	1
Pl	2018-02-26	afternoon	Food treat	o	x	o	r	0
Pl	2018-02-26	afternoon	Food treat	o	o	x	r	1
Pl	2018-02-26	evening	Food treat	o	x	o	m	1
Pl	2018-02-26	evening	Food treat	o	o	x	r	1
Pl	2018-02-26	evening	Food treat	x	o	o	l	1
Pl	2018-02-26	evening	Food treat	x	o	o	l	1
Pl	2018-02-26	evening	Food treat	o	x	o	r	0
Pl	2018-02-26	evening	Food treat	o	o	x	r	1
Pl	2018-02-26	evening	Food treat	o	x	o	m	1
Pl	2018-02-26	evening	Food treat	x	o	o	l	1
Pl	2018-02-26	evening	Food treat	o	o	x	m	0
Pl	2018-02-26	evening	Food treat	o	o	x	r	1
Pl	2018-02-26	evening	Food treat	x	o	o	r	0
Pl	2018-02-26	evening	Food treat	o	x	o	m	1
Pl	2018-02-26	evening	Food treat	x	o	o	l	1
Pl	2018-02-26	evening	Food treat	o	x	o	m	1
Pl	2018-02-26	evening	Food treat	o	o	x	r	1
Pl	2018-02-26	evening	Food treat	o	x	o	m	1
Pl	2018-02-26	evening	Food treat	o	o	x	m	0
Pl	2018-02-26	evening	Food treat	x	o	o	l	1
Pl	2018-02-26	evening	Food treat	o	x	o	m	1
Pl	2018-02-26	evening	Food treat	x	o	o	l	1
Pl	2018-02-26	evening	Food treat	x	o	o	r	0
Pl	2018-02-26	evening	Food treat	o	o	x	l	0
Pl	2018-02-26	evening	Food treat	o	x	o	m	1
Pl	2018-02-26	evening	Food treat	o	o	x	r	1
